# Supplementary material for: Non–ST‐Segment–Elevation Myocardial Infarction Among Patients With Chronic Kidney Disease: A Propensity Score–Matched Comparison of Percutaneous Coronary Intervention Versus Conservative Management
Source: PubMed Central journal article supplement — J Am Heart Assoc. 2018 Mar 10;7(6):e007920. doi: 10.1161/JAHA.117.007920 (PMC5907556; doi:10.1161/jaha.117.007920), 2018-03-10
Supplement: JAH3-7-e007920-s001.pdf [file JAH3-7-e007920-s001.pdf]

# **SUPPLEMENTAL MATERIAL**

Table S1. Propensity demographics for NSTEMI admissions with no CKD.

|                                    | No PCI  | PCI     | P-value |
|------------------------------------|---------|---------|---------|
| <b>Total number of admissions</b>  | 232,786 | 232,786 |         |
| <b>Mean age (years)</b>            | 65      | 65      | 0.459   |
| <b>Sex(%)</b>                      |         |         | 0.498   |
| Male                               | 64      | 63      |         |
| Female                             | 36      | 37      |         |
| <b>Race (%)</b>                    |         |         | 0.674   |
| White                              | 65      | 65      |         |
| Black/Hispanic/Asian               | 15      | 15      |         |
| Other                              | 3.2     | 3.3     |         |
| Missing                            | 17      | 17      |         |
| <b>Comorbidities (%)</b>           |         |         |         |
| Obesity                            | 14      | 14      | 0.6455  |
| Hypertension                       | 70      | 71      | 0.875   |
| Diabetes                           | 34      | 33      | 0.221   |
| Heart failure                      | 18      | 18      | 0.5863  |
| Chronic pulmonary disease          | 18      | 18      | 0.522   |
| Peripheral vascular disease        | 10      | 9.8     | 0.48    |
| Smoking                            | 25      | 26      | <0.001  |
| Hyperlipidemia                     | 65      | 65      | 0.4595  |
| <b>Median household income (%)</b> |         |         | 0.456   |
| 1. 0-25th percentile               | 28      | 28      |         |
| 2. 26-50th percentile              | 28      | 27      |         |
| 3. 51-75th percentile              | 24      | 24      |         |
| 4. 76-100th percentile             | 20      | 21      |         |
| <b>Primary Payer (%)</b>           |         |         | 0.158   |

|                                     |     |     |        |
|-------------------------------------|-----|-----|--------|
| Medicare / Medicaid                 | 58  | 56  |        |
| Private, including HMO              | 32  | 33  |        |
| Self pay/no charge/other            | 9.9 | 10  |        |
| <b>Admission type (%)</b>           |     |     | 0.317  |
| Non elective                        | 91  | 91  |        |
| elective                            | 8.6 | 8.9 |        |
| <b>Admission day (%)</b>            |     |     | 0.1534 |
| Weekday                             | 76  | 76  |        |
| Weekend                             | 24  | 24  |        |
| <b>Hospital bed size (%)</b>        |     |     | 0.427  |
| Small                               | 7.6 | 7.9 |        |
| Medium                              | 22  | 22  |        |
| Large                               | 70  | 70  |        |
| <b>Hospital region (%)</b>          |     |     | 0.064  |
| Northeast                           | 18  | 18  |        |
| Midwest                             | 24  | 24  |        |
| South                               | 42  | 41  |        |
| West                                | 17  | 17  |        |
| <b>Hospital teaching status (%)</b> |     |     | 0.164  |
| Non teaching                        | 46  | 45  |        |
| Teaching                            | 54  | 55  |        |

**Table S2. Propensity demographics for NSTEMI admissions with CKD stage 3 .**

|                                   | No PCI | PCI  | P-value |
|-----------------------------------|--------|------|---------|
| <b>Total number of admissions</b> | 9355   | 9355 |         |
| <b>Mean age (years)</b>           | 73     | 73   | 0.614   |
| <b>Sex(%)</b>                     |        |      | 0.421   |
| Male                              | 63     | 63   |         |
| Female                            | 37     | 37   |         |

|                                    |     |     |       |
|------------------------------------|-----|-----|-------|
| <b>Race (%)</b>                    |     |     | 0.587 |
| White                              | 68  | 68  |       |
| Black/Hispanic/Asian               | 17  | 17  |       |
| Other                              | 3.4 | 3.1 |       |
| Missing                            | 11  | 12  |       |
| <b>Comorbidities (%)</b>           |     |     |       |
| Obesity                            | 20  | 20  | 0.828 |
| Hypertension                       | 87  | 87  | 0.555 |
| Diabetes                           | 57  | 57  | 0.660 |
| Heart failure                      | 48  | 47  | 0.198 |
| Chronic pulmonary disease          | 26  | 25  | 0.368 |
| Peripheral vascular disease        | 23  | 23  | 0.668 |
| Smoking                            | 12  | 12  | 0.423 |
| Hyperlipidemia                     | 72  | 72  | 0.612 |
| <b>Median household income (%)</b> |     |     | 0.660 |
| 1. 0-25th percentile               | 29  | 29  |       |
| 2. 26-50th percentile              | 29  | 29  |       |
| 3. 51-75th percentile              | 23  | 24  |       |
| 4. 76-100th percentile             | 19  | 19  |       |
| <b>Primary Payer (%)</b>           |     |     | 0.171 |
| Medicare / Medicaid                | 82  | 81  |       |
| Private, including HMO             | 14  | 15  |       |
| Self pay/no charge/other           | 3.8 | 3.9 |       |
| <b>Admission type (%)</b>          |     |     | 0.328 |
| Non elective                       | 93  | 93  |       |
| elective                           | 6.8 | 7.1 |       |
| <b>Admission day (%)</b>           |     |     | 0.594 |
| Weekday                            | 77  | 76  |       |
| Weekend                            | 23  | 24  |       |
| <b>Hospital bed size (%)</b>       |     |     | 0.210 |
| Small                              | 8.7 | 9.2 |       |

|                                     |    |    |       |
|-------------------------------------|----|----|-------|
| Medium                              | 21 | 21 |       |
| Large                               | 71 | 70 |       |
| <b>Hospital region (%)</b>          |    |    | 0.324 |
| Northeast                           | 14 | 15 |       |
| Midwest                             | 30 | 31 |       |
| South                               | 39 | 38 |       |
| West                                | 17 | 17 |       |
| <b>Hospital teaching status (%)</b> |    |    | 0.701 |
| Non teaching                        | 42 | 42 |       |
| Teaching                            | 58 | 58 |       |

**Table S3. Propensity demographics for NSTEMI admissions with CKD stage 4.**

|                                   | No PCI | PCI  | P-value |
|-----------------------------------|--------|------|---------|
| <b>Total number of admissions</b> | 2525   | 2525 |         |
| <b>Mean age (years)</b>           | 73     | 72   |         |
| <b>Sex (%)</b>                    |        |      | 0.405   |
| Male                              | 59     | 58   |         |
| Female                            | 41     | 42   |         |
| <b>Race (%)</b>                   |        |      | 0.984   |
| White                             | 64     | 64   |         |
| Black/Hispanic/Asian              | 19     | 19   |         |
| Other                             | 2.9    | 2.9  |         |
| Missing                           | 13     | 14   |         |
| <b>Comorbidities (%)</b>          |        |      |         |
| Obesity                           | 17     | 18   | 0.532   |
| Hypertension                      | 83     | 83   | 0.906   |
| Diabetes                          | 64     | 62   | 0.189   |
| Heart failure                     | 60     | 59   | 0.423   |
| Chronic pulmonary disease         | 25     | 25   | 0.961   |
| Peripheral vascular disease       | 25     | 26   | 0.684   |

|                                     |     |     |       |
|-------------------------------------|-----|-----|-------|
| Smoking                             | 8.3 | 8.8 | 0.584 |
| Hyperlipidemia                      | 63  | 63  | 0.928 |
| <b>Median household income (%)</b>  |     |     | 0.968 |
| 1. 0-25th percentile                | 29  | 30  |       |
| 2. 26-50th percentile               | 29  | 29  |       |
| 3. 51-75th percentile               | 24  | 23  |       |
| 4. 76-100th percentile              | 18  | 18  |       |
| <b>Primary Payer (%)</b>            |     |     | 0.571 |
| Medicare / Medicaid                 | 83  | 83  |       |
| Private, including HMO              | 13  | 14  |       |
| Self pay/no charge/other            | 3.8 | 3.4 |       |
| <b>Admission type (%)</b>           |     |     | 0.466 |
| Non elective                        | 93  | 92  |       |
| elective                            | 7.3 | 7.8 |       |
| <b>Admission day (%)</b>            |     |     | 0.629 |
| Weekday                             | 76  | 76  |       |
| Weekend                             | 24  | 24  |       |
| <b>Hospital bed size (%)</b>        |     |     | 0.686 |
| Small                               | 8.2 | 8.7 |       |
| Medium                              | 23  | 22  |       |
| Large                               | 69  | 69  |       |
| <b>Hospital region (%)</b>          |     |     | 0.938 |
| Northeast                           | 15  | 16  |       |
| Midwest                             | 30  | 29  |       |
| South                               | 40  | 40  |       |
| West                                | 15  | 15  |       |
| <b>Hospital teaching status (%)</b> |     |     | 0.755 |
| Non teaching                        | 40  | 41  |       |
| Teaching                            | 60  | 59  |       |

**Table S4. Propensity demographics for NSTEMI admissions with CKD stage 5 .**

|                                    | No PCI | PCI  | P-value |
|------------------------------------|--------|------|---------|
| <b>Total number of admissions</b>  | 8300   | 8300 |         |
| <b>Mean age (years)</b>            | 65     | 65   | 0.306   |
| <b>Sex(%)</b>                      |        |      | 0.9717  |
| Male                               | 58     | 58   |         |
| Female                             | 42     | 42   |         |
| <b>Race (%)</b>                    |        |      | 0.7035  |
| White                              | 46     | 46   |         |
| Black/Hispanic/Asian               | 38     | 37   |         |
| Other                              | 4.6    | 4.9  |         |
| Missing                            | 11     | 12   |         |
| <b>Comorbidities (%)</b>           |        |      |         |
| Obesity                            | 13     | 13   | 0.8538  |
| Hypertension                       | 91     | 90   | 0.1163  |
| Diabetes                           | 68     | 68   | 0.4964  |
| Heart failure                      | 52     | 52   | 0.9192  |
| Chronic pulmonary disease          | 21     | 21   | 0.2262  |
| Peripheral vascular disease        | 24     | 24   | 0.846   |
| Smoking                            | 8.7    | 9    | 0.478   |
| Hyperlipidemia                     | 53     | 53   | 0.906   |
| <b>Median household income (%)</b> |        |      | 0.624   |
| 1. 0-25th percentile               | 35     | 34   |         |
| 2. 26-50th percentile              | 25     | 25   |         |
| 3. 51-75th percentile              | 23     | 23   |         |
| 4. 76-100th percentile             | 17     | 18   |         |
| <b>Primary Payer (%)</b>           |        |      | 0.9822  |
| Medicare / Medicaid                | 86     | 86   |         |
| Private, including HMO             | 12     | 12   |         |
| Self pay/no charge/other           | 2.2    | 2.3  |         |
| <b>Admission type (%)</b>          |        |      | 0.0321  |

|                                     |     |     |        |
|-------------------------------------|-----|-----|--------|
| Non elective                        | 92  | 91  |        |
| elective                            | 8   | 8.9 |        |
| <b>Admission day (%)</b>            |     |     | 0.3169 |
| Weekday                             | 79  | 79  |        |
| Weekend                             | 21  | 21  |        |
| <b>Hospital bed size</b>            |     |     | 0.4593 |
| Small                               | 5.9 | 6.3 |        |
| Medium                              | 21  | 22  |        |
| Large                               | 73  | 72  |        |
| <b>Hospital region (%)</b>          |     |     | 0.384  |
| Northeast                           | 18  | 18  |        |
| Midwest                             | 20  | 21  |        |
| South                               | 40  | 39  |        |
| West                                | 22  | 22  |        |
| <b>Hospital teaching status (%)</b> |     |     | 0.5394 |
| Non teaching                        | 39  | 38  |        |
| Teaching                            | 61  | 62  |        |

**Table S5. Multivariate analysis to assess interaction between CKD and PCI on all-cause in-hospital mortality.**

|                                 | Odds ratio (95% CI) | P-value |
|---------------------------------|---------------------|---------|
| No CKD & PCI                    | 0.34 (0.32-0.35)    | <0.001  |
| CKD stage 3 & PCI               | 0.40 (0.35-0.47)    | <0.001  |
| CKD stage 4 & PCI               | 0.72 (0.59-0.88)    | 0.001   |
| CKD stage 5/ESRD/Dialysis & PCI | 0.84 (0.75-0.94)    | 0.002   |

CKD = chronic kidney disease; ESRD = end-stage renal disease; CI = confidence interval; PCI = percutaneous coronary intervention



| <b>Table S6. Impact of PCI on all-cause in hospital mortality on NSTEMI admissions.</b> |                         |                    |                     |         |
|-----------------------------------------------------------------------------------------|-------------------------|--------------------|---------------------|---------|
| <b>CKD stage</b>                                                                        | Number of matched pairs | Medical Management | PCI                 |         |
|                                                                                         |                         |                    | Odds ratio (95% CI) | P-value |
| No CKD                                                                                  | 122,057                 | <i>Reference</i>   | 0.41 (0.39-0.43)    | <0.001  |
| Stage 3                                                                                 | 8,277                   | <i>Reference</i>   | 0.45 (0.38-0.53)    | <0.001  |
| Stage 4                                                                                 | 2,498                   | <i>Reference</i>   | 0.65 (0.52-0.81)    | 0.002   |
| Stage 5, ESRD, or on HD                                                                 | 7,997                   | <i>Reference</i>   | 0.43 (0.38-0.48)    | <0.001  |

Propensity score match (1:2) model adjusted for age, sex, race, comorbidities (obesity, hypertension, diabetes, heart failure, chronic pulmonary disease, peripheral vascular disease, smoking, and hyperlipidemia), median household income, primary payer insurance status, admission type (elective vs non elective), admission day (weekend or weekday), hospital bed size, hospital region, and hospital teaching status.
